# Supplementary material
Source: Frontiers journal article supplement (https://www.frontiersin.org/articles/384099)
Supplement: Data_Sheet_1.xlsx [file Data_Sheet_1.xlsx]

## Sheet: SUMMARY
Revised	2018-07-25
Concentrated Sugar Production
Feedstock: FHR
location specific value
Annual Revenue
Product	Annual Product	Units	Revenue $/BDMT	Total Annual Revenue, $MM
Concentrated Sugar	74333.2	BDMT/yr	495.872	36.8597	Use MSP button to set value to attain nominal financial discount rate
Wood Pellets	154856	BDMT/yr	275.997	47.0138	*1.1 b/c sales price for 10% MC pellets; http://biomassmagazine.com/articles/3853/wood-pellets-an-expanding-market-opportunity
Hog Fuel	22430.4	BDMT/yr	49.604	1.11264
			Combined Revenue, $MM/yr	84.9862
FHR to Mill Gate	249.227	k BDMT/yr
FHR Cost to Mill Gate	56.8527	$/BDMT
Assumed annual Inflation	0.02
Equity Percent of Total Investment	0.3
Target Nominal Financial Discount Rate	0.122	match if NPV = 0
Actual Nominal Financial Discount Rate	0.122
Real Discount Rate	0.1
DCFROR IRR	0.0772473
Capital Costs (MM$)			Manufacturing Costs (MM$ per year)
FHR Prep	6.31227		Feedstock	14.1692
3-stage milling	8.57646		FHR Prep	5.74696
Saccharifcation	5.65432		3-stage milling	13.9895
Pellets	2.85709		Saccharification	4.22107
Total Capital Investment (TCI)	120.428		Pellets	9.23749
Loan Rate	0.08		WWT	0.727749
Term (years)	10		Utilities	0.755328
Production(BDST/yrl/yr)	74333.2		Enzymes	3.2
			Fixed Costs (Labor, Prop Tax, Insurance, Maint.)	17.059
			Total Manufacturing Costs	69.1063

## Sheet: Inputs
		location specific value
Item	Defined Name	Value	source
cost year	CostYr	2015
k BDMT/yr through process	FeedPerYr	226.796
OD kg/hr through process	kgPrHr	28766.6
Sceen Loss (%)	ScreenLoss	0.09	Marrs et al. 2016
BDMT/day Feedstock to mill gate	FeedPerD	758.681
k BDMT/yr Feedstock to mill gate	FeedYrBFLoss	249.227
days per year	DaysPrYr	328.5	Jones et al. 2013 (90% up-time)
hours per day	HrsPrDay	24
Feedstock Cost ($/BDMT)	FeedCost	56.8527	Martinkus et al. 2017
electricity cost ($/kwh)	ElecCost	0.04224	EIA 2017a: 2011 -2015 average for WA
natural gas cost ($/k cf)	NGkcfCost	8.814	EIA 2017b: 2011 -2015 average for WA
natural gas cost ($/MMbtu)	NGMMbtuCost	8.57393	EIA 2017b: conversion
Inflation Rate	InfRate	0.02
Enzyme Cost $/gal	EnzCost	0.5	Humbird et al. 2011
Hog Fuel ($/BDMT)	HogFuel	49.604	Marrs et al. 2016
Diesel Cost ($/gal)	Diesel	3.54
Yield	Defined Name	Value
Sugar Yield (BDMT/BDMT)	SugarYield	0.327753
Sugar Produced (BDMT/yr)	SugarProd	74333.2
Wood Pellet Yield (BDMT/BDMT)	PelletYield	0.6828
Micronized Wood Yield (BDMT/BDMT)	MiconYield	0.91
Conversion metric to US
MT/ST	0.907185
l/gal	3.78541
J/btu	1055.06

## Sheet: CBA
Model spreadsheet provided by Wallace E. Tyner and Dawoon Jeong, Purdue University
Variable	DefinedName	Value					Varialbe	Defined Name	$ are MM
Fixed Capital Investment	FCI	1.06606e+08					Total Project Investment	TPI	120.428
Land	LandCost	1.80642e+06					Equity	Equity	0.3
Total Project Investment	TPI	1.20428e+08					Loan Interest	LoanInt	0.08
Depreciation Period (Years)							Loan Term, years	LoanYrs	10
General Plant	DepLife	7	IRS 2017				Annual Loan Payment ($MM)	LoanPayment	12.5631
Construction Period (Years)	ConstYrs	3					Working Capital (% yearly OPEX)		0.2
% Spent in Year 1	SpendYr1	0.08					Real Discount Rate	RealDiscRate	0.1
% Spent in Year 2	SpendYr2	0.6					Nominal Discount Rate	NomDiscRate	0.122
% Spent in Year 3	SpendYr3	0.32					Income Tax Rate	InTaxRate	0.169
Start-up Time (Years)	StartUp	0.75
Feedstock use (% of Normal)	StartupFuel	0.5
Variable Costs (% of Normal)	StartupVar	0.75
Fixed Cost (% of Normal)	StartupFixed	1
Production Rate, start up (%)	ProdRamp	0.5
Nominal Discount Rate	NomDiscRate	0.122
	Dep7yr	2
Sugar price ($/BDMT)		495.872
NPV (Financial-Nominal)	-7.88553e-09
	Economic Analysis (Real):
	Year	Total Capital Investment	Working Capital	Land	Sugar Sales	Co-Product Sales	Total Annual Sales	Feedstock Cost	Other Variable Cost	Fixed Operating Costs	Total Product Cost	Net Revenue
	1	-8.52852e+06		1.80642e+06	0	0	0	0	0	0	0	-1.03349e+07
	2	-6.39639e+07			0	0	0	0	0	0	0	-6.39639e+07
	3	-3.41141e+07	1.38213e+07		0	0	0	0	0	0	0	-4.79353e+07
	4				2.30373e+07	3.0079e+07	5.31164e+07	8.85575e+06	3.07759e+07	1.7059e+07	5.66907e+07	-3.57432e+06
	5				3.68597e+07	4.81265e+07	8.49862e+07	1.41692e+07	3.78781e+07	1.7059e+07	6.91063e+07	1.58799e+07
	6				3.68597e+07	4.81265e+07	8.49862e+07	1.41692e+07	3.78781e+07	1.7059e+07	6.91063e+07	1.58799e+07
	7				3.68597e+07	4.81265e+07	8.49862e+07	1.41692e+07	3.78781e+07	1.7059e+07	6.91063e+07	1.58799e+07
	8				3.68597e+07	4.81265e+07	8.49862e+07	1.41692e+07	3.78781e+07	1.7059e+07	6.91063e+07	1.58799e+07
	9				3.68597e+07	4.81265e+07	8.49862e+07	1.41692e+07	3.78781e+07	1.7059e+07	6.91063e+07	1.58799e+07
	10				3.68597e+07	4.81265e+07	8.49862e+07	1.41692e+07	3.78781e+07	1.7059e+07	6.91063e+07	1.58799e+07
	11				3.68597e+07	4.81265e+07	8.49862e+07	1.41692e+07	3.78781e+07	1.7059e+07	6.91063e+07	1.58799e+07
	12				3.68597e+07	4.81265e+07	8.49862e+07	1.41692e+07	3.78781e+07	1.7059e+07	6.91063e+07	1.58799e+07
	13				3.68597e+07	4.81265e+07	8.49862e+07	1.41692e+07	3.78781e+07	1.7059e+07	6.91063e+07	1.58799e+07
	14				3.68597e+07	4.81265e+07	8.49862e+07	1.41692e+07	3.78781e+07	1.7059e+07	6.91063e+07	1.58799e+07
	15				3.68597e+07	4.81265e+07	8.49862e+07	1.41692e+07	3.78781e+07	1.7059e+07	6.91063e+07	1.58799e+07
	16				3.68597e+07	4.81265e+07	8.49862e+07	1.41692e+07	3.78781e+07	1.7059e+07	6.91063e+07	1.58799e+07
	17				3.68597e+07	4.81265e+07	8.49862e+07	1.41692e+07	3.78781e+07	1.7059e+07	6.91063e+07	1.58799e+07
	18				3.68597e+07	4.81265e+07	8.49862e+07	1.41692e+07	3.78781e+07	1.7059e+07	6.91063e+07	1.58799e+07
	19				3.68597e+07	4.81265e+07	8.49862e+07	1.41692e+07	3.78781e+07	1.7059e+07	6.91063e+07	1.58799e+07
	20				3.68597e+07	4.81265e+07	8.49862e+07	1.41692e+07	3.78781e+07	1.7059e+07	6.91063e+07	1.58799e+07
	21				3.68597e+07	4.81265e+07	8.49862e+07	1.41692e+07	3.78781e+07	1.7059e+07	6.91063e+07	1.58799e+07
	22				3.68597e+07	4.81265e+07	8.49862e+07	1.41692e+07	3.78781e+07	1.7059e+07	6.91063e+07	1.58799e+07
	23		-1.38213e+07	-1.80642e+06	3.68597e+07	4.81265e+07	8.49862e+07	1.41692e+07	3.78781e+07	1.7059e+07	6.91063e+07	3.15076e+07
	NPV											-8.24118e+06
	IRR											0.0899706
	Economic Analysis (Nominal):
	Year	Total Capital Investment	Working Capital	Land	Sugar Sales	Co-Product Sales	Total Annual Sales	Feedstock Cost	Other Variable Cost	Fixed Operating Costs	Total Product Cost	Total Operating Cost	Net Revenue
	1	-8.69909e+06		1.84254e+06	0	0	0	0	0	0	0	0	-1.05416e+07
	2	-6.6548e+07			0	0	0	0	0	0	0	0	-6.6548e+07
	3	-3.62021e+07	1.46672e+07		0	0	0	0	0	0	0	0	-5.08694e+07
	4				2.49363e+07	3.25585e+07	5.74949e+07	9.58575e+06	3.33129e+07	1.84652e+07	6.13638e+07	6.13638e+07	-3.86896e+06
	5				4.06961e+07	5.31355e+07	9.38316e+07	1.56439e+07	4.18205e+07	1.88345e+07	7.62989e+07	7.62989e+07	1.75327e+07
	6				4.151e+07	5.41982e+07	9.57082e+07	1.59568e+07	4.26569e+07	1.92112e+07	7.78249e+07	7.78249e+07	1.78834e+07
	7				4.23402e+07	5.52822e+07	9.76224e+07	1.6276e+07	4.351e+07	1.95954e+07	7.93814e+07	7.93814e+07	1.8241e+07
	8				4.3187e+07	5.63878e+07	9.95749e+07	1.66015e+07	4.43802e+07	1.99873e+07	8.0969e+07	8.0969e+07	1.86058e+07
	9				4.40508e+07	5.75156e+07	1.01566e+08	1.69335e+07	4.52678e+07	2.03871e+07	8.25884e+07	8.25884e+07	1.8978e+07
	10				4.49318e+07	5.86659e+07	1.03598e+08	1.72722e+07	4.61732e+07	2.07948e+07	8.42402e+07	8.42402e+07	1.93575e+07
	11				4.58304e+07	5.98392e+07	1.0567e+08	1.76176e+07	4.70966e+07	2.12107e+07	8.5925e+07	8.5925e+07	1.97447e+07
	12				4.6747e+07	6.1036e+07	1.07783e+08	1.797e+07	4.80386e+07	2.16349e+07	8.76435e+07	8.76435e+07	2.01396e+07
	13				4.7682e+07	6.22567e+07	1.09939e+08	1.83294e+07	4.89993e+07	2.20676e+07	8.93963e+07	8.93963e+07	2.05423e+07
	14				4.86356e+07	6.35018e+07	1.12137e+08	1.8696e+07	4.99793e+07	2.2509e+07	9.11843e+07	9.11843e+07	2.09532e+07
	15				4.96083e+07	6.47719e+07	1.1438e+08	1.90699e+07	5.09789e+07	2.29592e+07	9.3008e+07	9.3008e+07	2.13723e+07
	16				5.06005e+07	6.60673e+07	1.16668e+08	1.94513e+07	5.19985e+07	2.34184e+07	9.48681e+07	9.48681e+07	2.17997e+07
	17				5.16125e+07	6.73887e+07	1.19001e+08	1.98403e+07	5.30385e+07	2.38867e+07	9.67655e+07	9.67655e+07	2.22357e+07
	18				5.26448e+07	6.87364e+07	1.21381e+08	2.02371e+07	5.40992e+07	2.43645e+07	9.87008e+07	9.87008e+07	2.26804e+07
	19				5.36977e+07	7.01112e+07	1.23809e+08	2.06419e+07	5.51812e+07	2.48517e+07	1.00675e+08	1.00675e+08	2.3134e+07
	20				5.47716e+07	7.15134e+07	1.26285e+08	2.10547e+07	5.62848e+07	2.53488e+07	1.02688e+08	1.02688e+08	2.35967e+07
	21				5.5867e+07	7.29437e+07	1.28811e+08	2.14758e+07	5.74105e+07	2.58558e+07	1.04742e+08	1.04742e+08	2.40686e+07
	22				5.69844e+07	7.44025e+07	1.31387e+08	2.19053e+07	5.85587e+07	2.63729e+07	1.06837e+08	1.06837e+08	2.455e+07
	23		-2.17947e+07	-2.84854e+06	5.81241e+07	7.58906e+07	1.34015e+08	2.23434e+07	5.97299e+07	2.69003e+07	1.08974e+08	1.08974e+08	4.96843e+07
	NPV												-8.24118e+06
	IRR												0.11177
	Financial Analysis (Nominal):																			(converted to nominal ters)
	Year	Total Capital Investment (Nominal)	Working Capital (Nominal)	Land	Loan Balance (Nominal)	Loan Payment (Nominal)	Equity Payment (Nominal)	Interest (Nominal)	Sugar Sales (Nominal)	Co-Product Sales (Nominal)	Feedstock Cost (Nominal)	Other Variable Cost (Nominal)	Fixed Operating Costs (Nominal)	Benefits	Costs	Net Revenue (Nominal)	DDB Depreciation	Straightline Depreciation	Actual Depreciation	Remaining Value	Taxable Income	Income Tax	AF/AT Income
	1	-8.69909e+06		1.84254e+06	-7.37914e+06		-3.16249e+06								0	0					0	0	-3.16249e+06
	2	-6.6548e+07			-5.45531e+07		-1.99644e+07								0	0					0	0	-1.99644e+07
	3	-3.62021e+07	1.46672e+07		-9.45259e+07		-1.52608e+07								1.46672e+07	-1.46672e+07					-1.46672e+07	-2.47876e+06	-2.74493e+07
	4					1.25631e+07		7.56207e+06	2.49363e+07	3.25585e+07	9.58575e+06	3.33129e+07	1.84652e+07	5.74949e+07	7.39269e+07	-1.64321e+07	3.18426e+07	1.59213e+07	3.18426e+07	7.96066e+07	-4.32737e+07	-7.31325e+06	-9.11881e+06
	5					1.25631e+07		7.04007e+06	4.06961e+07	5.31355e+07	1.56439e+07	4.18205e+07	1.88345e+07	9.38316e+07	8.8862e+07	4.9696e+06	2.27447e+07	1.32678e+07	2.27447e+07	5.68619e+07	-1.22521e+07	-2.07061e+06	7.04021e+06
	6					1.25631e+07		6.4763e+06	4.151e+07	5.41982e+07	1.59568e+07	4.26569e+07	1.92112e+07	9.57082e+07	9.0388e+07	5.32025e+06	1.62462e+07	1.13724e+07	1.62462e+07	4.06156e+07	-4.83919e+06	-817824	6.13808e+06
	7					1.25631e+07		5.86743e+06	4.23402e+07	5.52822e+07	1.6276e+07	4.351e+07	1.95954e+07	9.76224e+07	9.19445e+07	5.67792e+06	1.16045e+07	1.01539e+07	1.16045e+07	2.90112e+07	769125	129982	5.54794e+06
	8					1.25631e+07		5.20985e+06	4.3187e+07	5.63878e+07	1.66015e+07	4.43802e+07	1.99873e+07	9.95749e+07	9.35321e+07	6.04274e+06	8.2889e+06	9.67038e+06	9.67038e+06	1.93408e+07	3.7256e+06	629626	5.41311e+06
	9					1.25631e+07		4.49967e+06	4.40508e+07	5.75156e+07	1.69335e+07	4.52678e+07	2.03871e+07	1.01566e+08	9.51515e+07	6.41486e+06	5.92064e+06	9.67038e+06	9.67038e+06	9.67038e+06	4.8079e+06	812535	5.60232e+06
	10					1.25631e+07		3.73267e+06	4.49318e+07	5.86659e+07	1.72722e+07	4.61732e+07	2.07948e+07	1.03598e+08	9.68033e+07	6.79442e+06	4.22903e+06	9.67038e+06	9.67038e+06	0	5.95446e+06	1.0063e+06	5.78811e+06
	11					1.25631e+07		2.90432e+06	4.58304e+07	5.98392e+07	1.76176e+07	4.70966e+07	2.12107e+07	1.0567e+08	9.84881e+07	7.18157e+06					1.68404e+07	2.84602e+06	4.33555e+06
	12					1.25631e+07		2.00969e+06	4.6747e+07	6.1036e+07	1.797e+07	4.80386e+07	2.16349e+07	1.07783e+08	1.00207e+08	7.57646e+06					1.81299e+07	3.06395e+06	4.51251e+06
	13					1.25631e+07		1.04349e+06	4.7682e+07	6.22567e+07	1.83294e+07	4.89993e+07	2.20676e+07	1.09939e+08	1.01959e+08	7.97925e+06					1.94989e+07	3.29531e+06	4.68394e+06
	14								4.86356e+07	6.35018e+07	1.8696e+07	4.99793e+07	2.2509e+07	1.12137e+08	9.11843e+07	2.09532e+07					2.09532e+07	3.54109e+06	1.74121e+07
	15								4.96083e+07	6.47719e+07	1.90699e+07	5.09789e+07	2.29592e+07	1.1438e+08	9.3008e+07	2.13723e+07					2.13723e+07	3.61191e+06	1.77603e+07
	16								5.06005e+07	6.60673e+07	1.94513e+07	5.19985e+07	2.34184e+07	1.16668e+08	9.48681e+07	2.17997e+07					2.17997e+07	3.68415e+06	1.81156e+07
	17								5.16125e+07	6.73887e+07	1.98403e+07	5.30385e+07	2.38867e+07	1.19001e+08	9.67655e+07	2.22357e+07					2.22357e+07	3.75783e+06	1.84779e+07
	18								5.26448e+07	6.87364e+07	2.02371e+07	5.40992e+07	2.43645e+07	1.21381e+08	9.87008e+07	2.26804e+07					2.26804e+07	3.83299e+06	1.88474e+07
	19								5.36977e+07	7.01112e+07	2.06419e+07	5.51812e+07	2.48517e+07	1.23809e+08	1.00675e+08	2.3134e+07					2.3134e+07	3.90965e+06	1.92244e+07
	20								5.47716e+07	7.15134e+07	2.10547e+07	5.62848e+07	2.53488e+07	1.26285e+08	1.02688e+08	2.35967e+07					2.35967e+07	3.98784e+06	1.96089e+07
	21								5.5867e+07	7.29437e+07	2.14758e+07	5.74105e+07	2.58558e+07	1.28811e+08	1.04742e+08	2.40686e+07					2.40686e+07	4.0676e+06	2.0001e+07
	22								5.69844e+07	7.44025e+07	2.19053e+07	5.85587e+07	2.63729e+07	1.31387e+08	1.06837e+08	2.455e+07					2.455e+07	4.14895e+06	2.04011e+07
	23		-2.17947e+07	-2.84854e+06					5.81241e+07	7.58906e+07	2.23434e+07	5.97299e+07	2.69003e+07	1.34015e+08	8.71789e+07	4.68357e+07					4.68357e+07	7.91524e+06	4.1769e+07
	NPV																						-7.88553e-09
	IRR																						0.122

## Sheet: CAPEX
LAND ($MM)	1.80642	1.5% TCI, Peters et al. (mid of 1-2% range), use site specific number if possible
Process Area		Purchased Equipment Cost	Notes
FHR Prep	ISBL	6.31227e+06
3 Stage Milling	ISBL	9.30012e+06	sum of coarse, fine and amorphous milling, 10% delivery for FOB equipment per Peters et al. 2003
Saccharification	ISBL	5.65432e+06
Pellets	ISBL	2.85709e+06
Total Purcahsed Cost		2.41238e+07
Total Direct Costs (TDC)		7.62105e+07	Ratio Factor (TDC) =	3.15914	Ratio Factor from Peters et al. 2003: updated for greenfield facitlity, factor for WWT removed
Fixed Capital Investment (FCI)		1.06606e+08	Ratio Factor (FCI) =	4.41914	Ratio Factor from Peters et al. 2003: updated for greenfield facitlity, factor for WWT removed
Total Capital Investment (TCI)		1.20428e+08
Process Area		Installed Equipment Cost	Notes
FHR Prep	ISBL	6.31227
3 Stage Milling	ISBL	9.30012	sum of coarse, fine and amorphous milling
Feedstock Prep	ISBL	5.65432
Pellets	ISBL	2.85709
Total Purchased Equipment Cost		24.1238
Total Direct Costs (TDC)		76.2105
Fixed Capital Investment (FCI)		106.606
Total Capital Investment (TCI)		120.428

## Sheet: OPEX
Feedstock (MM$/yr)	14.1692		TOTAL OPEX	69.1063
Unit Op	OPEX, MM$
FHR Prep	5.74696
3 Stage Milling	13.9895	sum of coarse, fine and amorphous milling
Saccharification	4.22107
Pellets	9.23749
WWT	0.727749
Utilities	0.755328
Enzyme Purchase	3.2	6.4 is MM assumed gal of ethanol
TOTAL	37.8781
Fixed Operating Costs
Maintenance	0.06	FCI	6.75106	Peters et al. 2003
Labor + Benefits			7.64278	BLS 2017
Taxes and Insurance	0.025	FCI	2.66516	Jones et al. 2013
		TOTAL	17.059
OPERATING LABOR - adapted from Marrs et al. 2016 and Jones et al. 2013
Number of days of work per year	328.5
Benefits (%)	0.6	Wright et al.
Workers	Salary (2011)	# Positions	Total Cost (2011)
Plant Manager	161400	1	161400
Plant Engineer	76800	2	153600
Shift Supervisor	52700	8	421600
Lab Manager	61500	1	61500
Lab Technician	43900	4	175600
Shift Operators	52700	45	2371500
Yard Employees	28000	3	84000
Pellet Mill			1.06517e+06	0.20% reduction for pellet plant manager, maintenance supervisor, lab manager, admin
Clerks & Admin Asst.	39500	2	79000
		65	4.41197e+06
Adapted from Qian and McDow 2013
Cost (MM $/yr)
1.38301

## Sheet: FHRPrep
				Total Purchased Cost (MM$)	6.31227
				OPEX (MM$/yr)	5.74696
CAPEX
Equipment	count	Cost	flow rate/ capacity	year	scaling factor	purchased cost	NOTES
screen	2	100000	300 TPH	2010	0.6	202179	Marrs et al. 2016
feed bin	2	416700	40' diam x 80' tall	2010	0.6	842478	Marrs et al. 2016
dryer fan		INCLUDED			0.6
dryer burner		INCLUDED			0.6
rotary dryer	2	1558880	150 BDT/day 50% to 5% MC	2014	0.6	5.26762e+06	Industry Quote
dryer clylone		INCLUDED			0.6
dryer outfeed hopper		INCLUDED
					Total Purchased Equipment Cost	6.31227e+06
OPEX - Pirraglia
item	Units per Hour	Units	Units per Year	Cost per Unit	Cost per Year	NOTES
rotary dryer	0.0382	kWh/OD kg	8.66362e+06	0.04224	365951
rotary dryer	73.0594	MM BTU/hr	576000	8.57393	4.93858e+06	14.4 mmBTU/hr from quote
Front End Loaders (tractor)	60	liters	473040	0.935271	442421
				Total OPEX	5.74696e+06

## Sheet: Coarse
WY scale	2404.04	BDST/d		Total Purchased Cost (MM$)	1.33983
Current Scale	690.4	BDMT/d		Total OPEX (MM$/yr)	1.8355
CAPEX
Equipment	count	Purchased Cost per Unit	flow rate/ capacity	year	scaling factor	purchased cost
Feed Silo	2	416700	40' diam x 80' tall	2010	0.6	262928
hammermill	3	275000	8.3 BDT/hr	2010	0.6	906421
screen (1/8")	3	100000	300 TPH	2010	0.6	170485
					Total Purchased Cost	1.33983e+06
OPEX
Equipment	Power Use	Units	Units per Year	Cost per Unit	Additional Maintenance	Cost per Year	NOTES
hammermill	0.1916	kWh/kg	4.34542e+07	0.04224		1.8355e+06	Wang et al. 2018
hammermill					0.04	36256.8	additional 4% maintenance to reach 10% for milling equipment, Mani et al. 2006
					Total OPEX	1.8355e+06

## Sheet: Fine
				Total Purchased Cost (MM$)	2.75
				Total OPEX (MM$/yr)	6.69346
CAPEX
Equipment	count	Purchased Cost per Unit	flow rate/ capacity	year	scaling factor	Purchased Cost	Notes
fine mill - ACM	25	110000	1-1.5 MT/hr	2015	0.6	2750000	FOB industry quote, assumed ~1.2 MT/hr
fine mill cyclone		included			0.6
					Total Purchased Cost	2750000
OPEX
Equipment	Power Use	Units	Units per Year	Cost per Unit	Additional Maintenance	Cost per Year	NOTES
fine mill - ACM	0.6987	kWh/OD kg	1.58463e+08	0.04224		6.69346e+06	Wang et al. 2018
fine mill - ACM					0.04	121000
					Total OPEX	6.69346e+06

## Sheet: Amorphous
				Total Purchased Cost (MM$)	4.48662
				Total OPEX (MM$/yr)	5.46053
CAPEX
Equipment	count	Purchased Cost per Unit	flow rate/ capacity	year	Purchased Cost	Notes
media mill (rod)	8	589937	3.7-5.5 ST/h	2011	4.48662e+06	Industry Quote, assumed 4 MT/hr
media mill cyclone
				Total Purchased Cost	4.48662e+06
OPEX
Equipment	Power Use	Units	Units per Year	Cost per Unit	Additional Maintenance	Cost per Year	NOTES
media mill	0.57	kWh/kg	1.29274e+08	0.04224		5.46053e+06	Wang et al. 2018
media mill					0.04	197411
					Total OPEX	5.46053e+06

## Sheet: Saccharification
	NREL sugar production (MT/yr)	412940		Total Purchased Cost (MM$)	5.65432			NREL solids (%)	12.7	Humbird et al. 2013
	NARA sugar production (MT/yr)	74333.2		OPEX (MM$/yr)	4.22107			NARA solids (%)	8.4
								NREL concen. solids (%)	49	Humbird et al. 2013
CAPEX
Equipment	scale (BDMT/day)	Count	Cost year	Purchased Equipment Cost	NARA Purchased Cost	Notes
Ammonia Addition Tank Agitator	1995.81	1	2009	24742.2	12555.6	adapted from Humbird et al. 2011
Ammonia Static Mixer	1995.81	1	2009	5413.65	2747.19	adapted from Humbird et al. 2011
Hydrolyzate Pump	1995.81	1	2009	26194.9	13292.8	adapted from Humbird et al. 2011
Ammonia Addition Tank	1995.81	1	2009	269115	136565	adapted from Humbird et al. 2011
Enzyme-Hydrolyzate Mixer	250.002	3	2009	16253.3	49090.7	adapted from Humbird et al. 2011
Hydrolyzate Cooler	250.002	3	2010	13334.8	38162.8	adapted from Humbird et al. 2011
Saccharification Transfer Pump	250.002	3	2009	6782.29	20485	adapted from Humbird et al. 2011
Saccharification Tank	1995.81	1	2009	4.39191e+06	2.22871e+06	adapted from Humbird et al. 2011
Cellulase Storage Package	758.681	1	2011	317871	302186	adapted from Humbird et al. 2011
Belt Filter Press, WET wt, not OD	312	6	2016	38000	228000	industry quote
Sugar product pump	1995.81	1	2007	24983.8	7972.14	adapted from Humbird et al. 2011
Evaporator System	1995.81	1	2009	7400000	2.37712e+06	adapted from Humbird et al. 2011
3rd Evaporator Condenser	1995.81	1	2010	780061	237433	adapted from Humbird et al. 2011
				Total Purchased Equipment Cost	5.65432e+06
OPEX
NREL Area 300 OPEX	NREL year	NARA cost	Notes
2.15567e+06	2007	857553	BLS 2017
	NREL kW usage	NARA kW	NARA kWh/yr	Cost per Year	Notes
Humbird et al. Equip	5053.6	1955.25	1.54152e+07	651138	linear scaling from NREL value, sum of kW from area 300 with scale up for 8.4% starting solids instead of 12.7%
Belt Filter Press		42	331128	13986.8	7 kW per belt filter press, per quote - updated formula after publication complete
			Total	665124
NREL Steam Use (kg/hr)	NREL Steam Use (lb/hr)	NARA Steam Use (lb/hr)	Cost per Year	Notes
2638	5815.79	2011.83	183415	Humbird et al. 2011
		1146.4	btu/lb steam	http://www.engineeringtoolbox.com/saturated-steam-properties-d_273.html
Concntrate to Syrup
Estimate of NREL NG Use (MM Btu/hr)	NARA (MM BTU/hr)	NARA (MM BTU/yr)	Cost per Year	Notes
206.686	37.2055	293328	2.51497e+06	Humbird et al. 2011
		Total OPEX (MM$)	4.22107e+06

[truncated: 6 more sheets: Pellets, WWT, Utilities, References, CostYear, DCFROR]
